# Supplementary material for: Design of biochemical pattern forming systems from minimal motifs
Source: eLife journal article supplement (doi:10.7554/elife.48646), 2019-11-25
Supplement: supp [file elife-48646-supp-v1.zip]

Archive with 15 entries (15 files):
- elife_poa_e48646_Figure_3_video_1.mp4
- elife_poa_e48646_Figure_3_figure_supplement_4.pdf
- elife_poa_e48646_Figure_3_video_2.mp4
- elife_poa_e48646_Figure_3_video_3.mp4
- elife_poa_e48646_Figure_2_figure_supplement_2.pdf
- elife_poa_e48646_Figure_2_video_2.mp4
- elife_poa_e48646_Figure_2_figure_supplement_1.pdf
- elife_poa_e48646_Transparent_Reporting_File.docx
- elife_poa_e48646_Figure_2_video_3.mp4
- elife_poa_e48646_Figure_2_video_1.mp4
- elife_poa_e48646_Figure_3_figure_supplement_3.pdf
- elife_poa_e48646_Figure_3_figure_supplement_2.pdf
- elife_poa_e48646_Figure_3_video_4.mp4
- elife_poa_e48646_Figure_3_figure_supplement_1.pdf
- elife_poa_e48646_Figure_3_video_5.mp4
