# Supplementary material for: Design of biochemical pattern forming systems from minimal motifs
Source: eLife journal article supplement (doi:10.7554/elife.48646), 2019-11-25
Supplement: supp [file elife-48646-supp-v1.zip › elife_poa_e48646_Figure_2_figure_supplement_1.pdf]

Min system  
wild type

a)

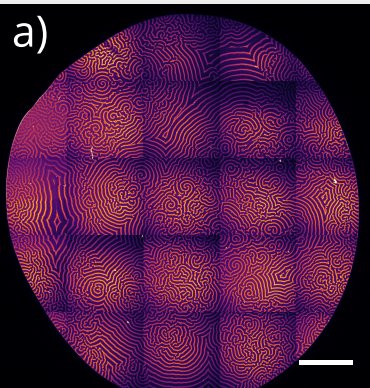

reduction  
of MinE

dimers

b)

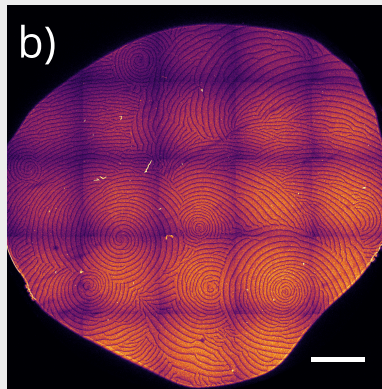

c)

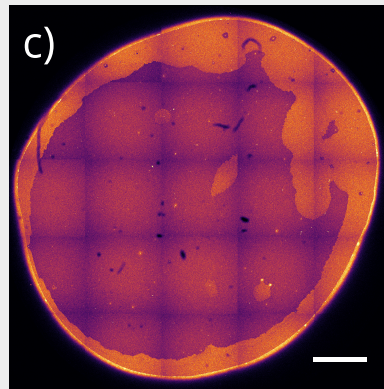

monomers

d)

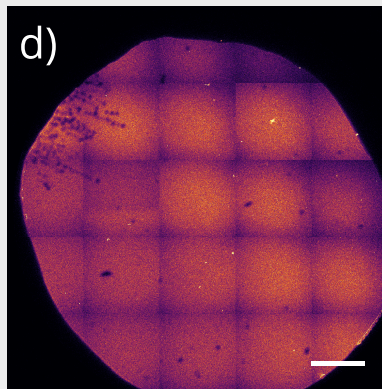

- MTS

e)

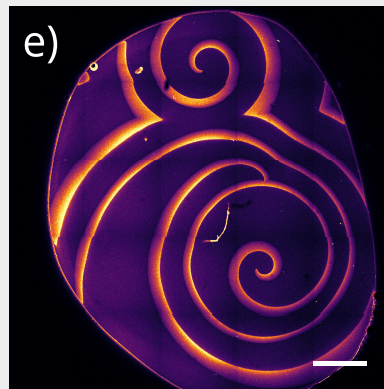

+ MTS

minimal systems for pattern formation
