# Supplementary figures and images for: Design of biochemical pattern forming systems from minimal motifs
Source: eLife journal article supplement (doi:10.7554/elife.48646), 2019-11-25

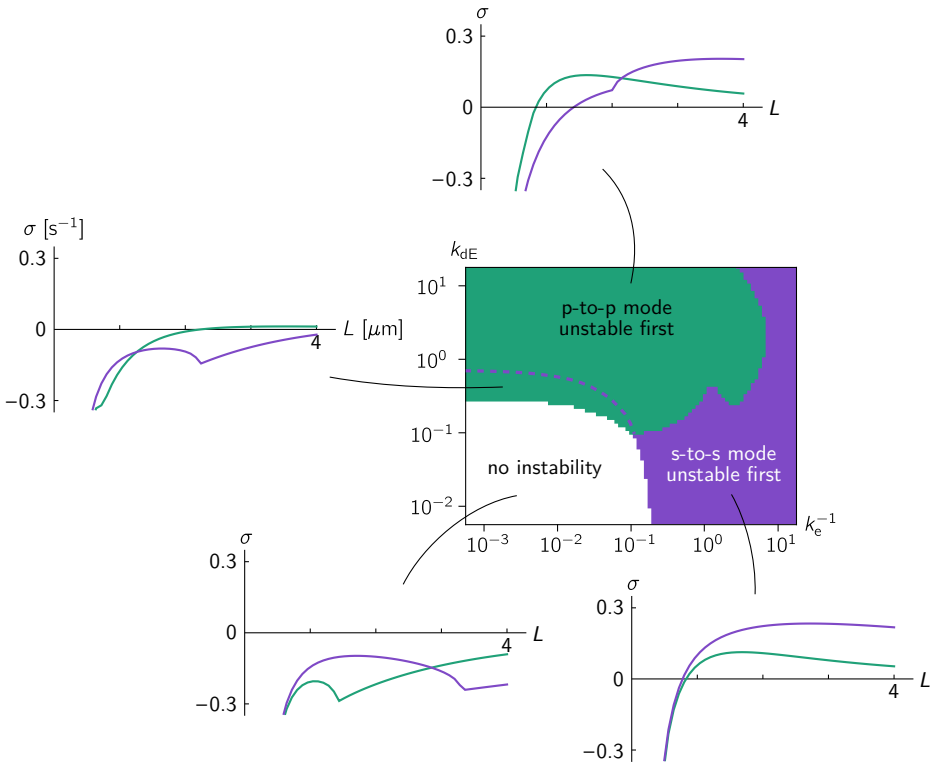

Supplement: supp [file elife-48646-supp-v1.zip › elife_poa_e48646_Figure_3_figure_supplement_4.pdf]

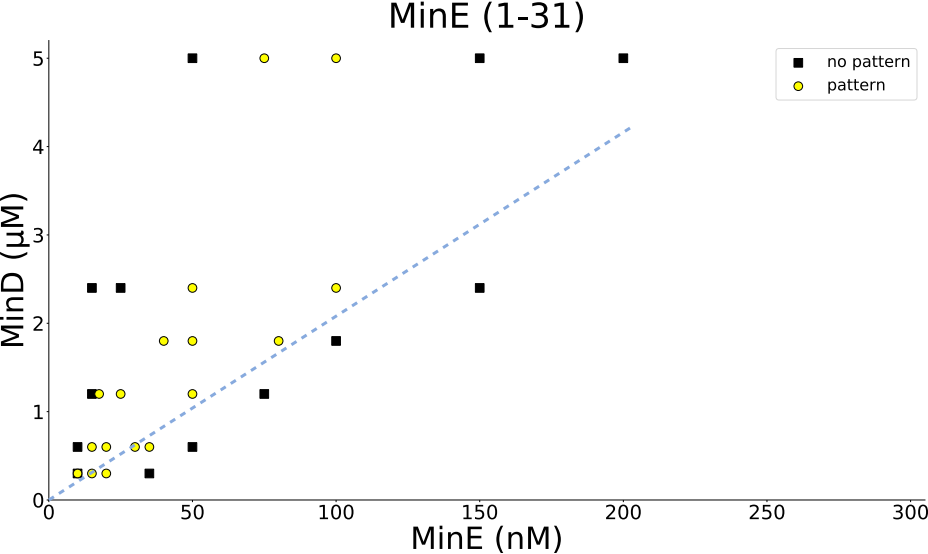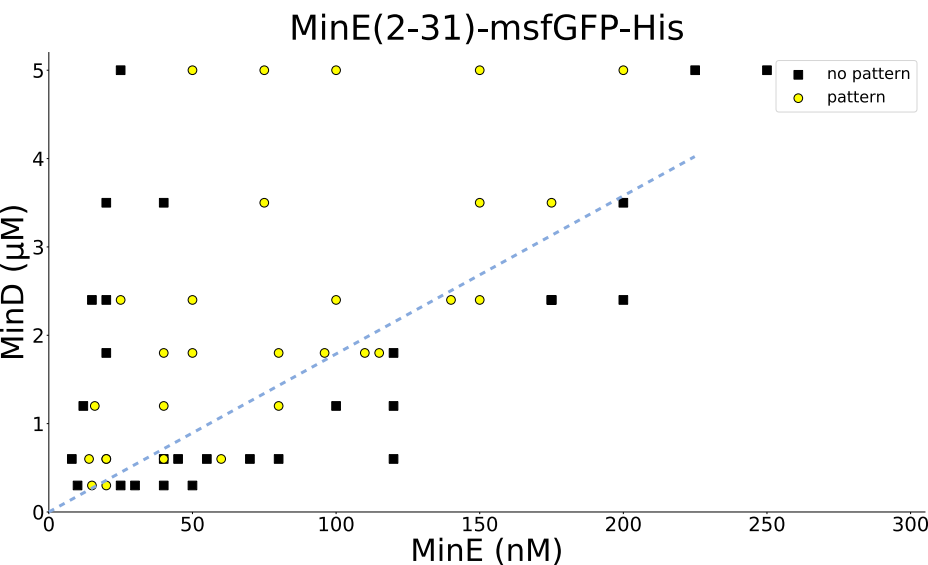

Supplement: supp [file elife-48646-supp-v1.zip › elife_poa_e48646_Figure_2_figure_supplement_2.pdf]

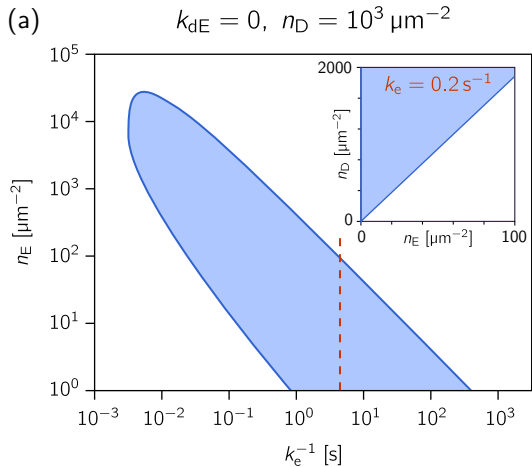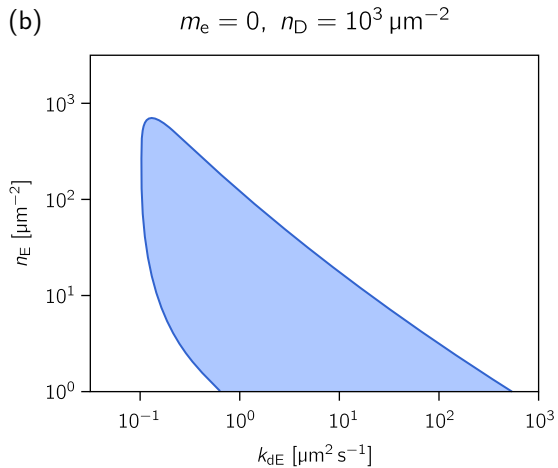

Supplement: supp [file elife-48646-supp-v1.zip › elife_poa_e48646_Figure_3_figure_supplement_3.pdf]

$$k_e = 10^3 \text{ s}^{-1}$$

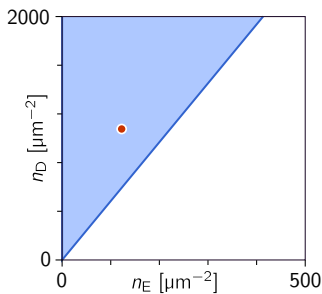

$$k_e = 1 \text{ s}^{-1}$$

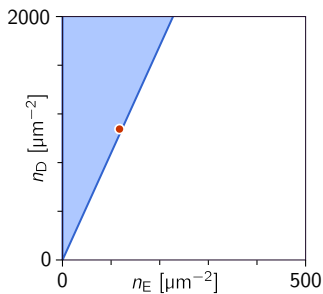

$$k_{dE} = 10^{-3} \mu\text{m}^2 \text{ s}^{-1}$$

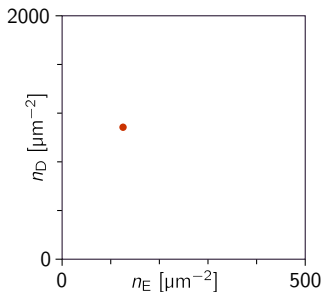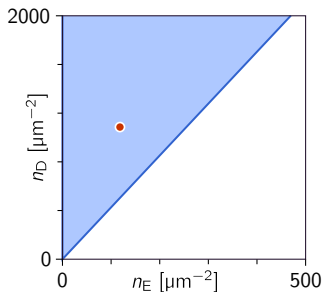

Supplement: supp [file elife-48646-supp-v1.zip › elife_poa_e48646_Figure_3_figure_supplement_2.pdf]

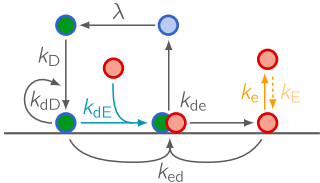

Supplement: supp [file elife-48646-supp-v1.zip › elife_poa_e48646_Figure_3_figure_supplement_1.pdf]
